# Supplementary material
Source: publisher figshare collection journal article supplement (https://acs.figshare.com/ndownloader/files/5100403)
Supplement: Supplementary file 1 [file 5100403]

data_jhs4cu
 
_audit_creation_method            SHELXL-97
_chemical_name_systematic
;
 ?
;
_chemical_name_common             'Compound jhs4cu'
_chemical_melting_point           ?
_chemical_formula_moiety          'C24 H58 Cl4 Cu2 N8 O14'
_chemical_formula_sum
 'C24 H58 Cl4 Cu2 N8 O14'
_chemical_formula_weight         951.7
 
loop_
 _atom_type_symbol
 _atom_type_description
 _atom_type_scat_dispersion_real
 _atom_type_scat_dispersion_imag
 _atom_type_scat_source
 'C'  'C'   0.0033   0.0016
 'International Tables Vol C Tables 4.2.6.8 and 6.1.1.4'
 'H'  'H'   0.0000   0.0000
 'International Tables Vol C Tables 4.2.6.8 and 6.1.1.4'
 'O'  'O'   0.0106   0.0060
 'International Tables Vol C Tables 4.2.6.8 and 6.1.1.4'
 'N'  'N'   0.0061   0.0033
 'International Tables Vol C Tables 4.2.6.8 and 6.1.1.4'
 'Cl'  'Cl'   0.1484   0.1585
 'International Tables Vol C Tables 4.2.6.8 and 6.1.1.4'
 'Cu'  'Cu'   0.3201   1.2651
 'International Tables Vol C Tables 4.2.6.8 and 6.1.1.4'
 
_symmetry_cell_setting            orthorhombic
_symmetry_space_group_name_H-M    F222
 
loop_
 _symmetry_equiv_pos_as_xyz
 'x, y, z'
 'x, -y, -z'
 'x+1/4, -y+1/4, z+1/4'
 'x+1/4, y+1/4, -z+1/4'
 'x, y+1/2, z+1/2'
 'x, -y+1/2, -z+1/2'
 'x+1/4, -y+3/4, z+3/4'
 'x+1/4, y+3/4, -z+3/4'
 'x+1/2, y, z+1/2'
 'x+1/2, -y, -z+1/2'
 'x+3/4, -y+1/4, z+3/4'
 'x+3/4, y+1/4, -z+3/4'
 'x+1/2, y+1/2, z'
 'x+1/2, -y+1/2, -z'
 'x+3/4, -y+3/4, z+1/4'
 'x+3/4, y+3/4, -z+1/4'
 
_cell_length_a                    9.9380(2)
_cell_length_b                    30.2470(6)
_cell_length_c                    53.1430(13)
_cell_angle_alpha                 90.00
_cell_angle_beta                  90.00
_cell_angle_gamma                 90.00
_cell_volume                      15974.5(6)
_cell_formula_units_Z             18
_cell_measurement_temperature     293(2)
_cell_measurement_reflns_used     4423
_cell_measurement_theta_min       2.91
_cell_measurement_theta_max       27.485
 
_exptl_crystal_description        prism
_exptl_crystal_colour             blue
_exptl_crystal_size_max           0.2
_exptl_crystal_size_mid           0.15
_exptl_crystal_size_min           0.1
_exptl_crystal_density_meas       ?
_exptl_crystal_density_diffrn     1.578
_exptl_crystal_density_method     'not measured'
_exptl_crystal_F_000              7848
_exptl_absorpt_coefficient_mu     1.554
_exptl_absorpt_correction_type    none
_exptl_absorpt_correction_T_min   ?
_exptl_absorpt_correction_T_max   ?
_exptl_absorpt_process_details    ?
 
_exptl_special_details
;
 ?
;
 
_diffrn_ambient_temperature       293(2)
_diffrn_radiation_wavelength      0.71073
_diffrn_radiation_type            MoK\a
_diffrn_radiation_source          'fine-focus sealed tube'
_diffrn_radiation_monochromator   graphite
_diffrn_measurement_device_type   KappaCCD
_diffrn_measurement_method        'CCD rotation images, thick slices'
_diffrn_detector_area_resol_mean  9
_diffrn_standards_number          ?
_diffrn_standards_interval_count  ?
_diffrn_standards_interval_time   ?
_diffrn_standards_decay_%         ?
_diffrn_reflns_number             8185
_diffrn_reflns_av_R_equivalents   0.0000
_diffrn_reflns_av_sigmaI/netI     0.1806
_diffrn_reflns_limit_h_min        -12
_diffrn_reflns_limit_h_max        12
_diffrn_reflns_limit_k_min        -38
_diffrn_reflns_limit_k_max        38
_diffrn_reflns_limit_l_min        -67
_diffrn_reflns_limit_l_max        67
_diffrn_reflns_theta_min          3.07
_diffrn_reflns_theta_max          27.49
_reflns_number_total              8185
_reflns_number_gt                 3621
_reflns_threshold_expression      >2sigma(I)
 
_computing_data_collection        'Collect (Nonius BV, 1997-2000)'
_computing_cell_refinement        'HKL Scalepack (Otwinowski & Minor 1997)'
_computing_data_reduction         'HKL Denzo and Scalepack (Otwinowski & Minor 19'
_computing_structure_solution     'SHELXS-97 (Sheldrick, 1997)'
_computing_structure_refinement   'SHELXL-97 (Sheldrick, 1997)'
_computing_molecular_graphics     'Ortep-3 for Windows (Farrugia, 1997)'
_computing_publication_material   'WinGX publication routines (Farrugia, 1999)'
 
_refine_special_details
;
 Refinement of F^2^ against ALL reflections.  The weighted R-factor wR and
 goodness of fit S are based on F^2^, conventional R-factors R are based
 on F, with F set to zero for negative F^2^. The threshold expression of
 F^2^ > 2sigma(F^2^) is used only for calculating R-factors(gt) etc. and is
 not relevant to the choice of reflections for refinement.  R-factors based
 on F^2^ are statistically about twice as large as those based on F, and R-
 factors based on ALL data will be even larger.
;
 
_refine_ls_structure_factor_coef  Fsqd
_refine_ls_matrix_type            full
_refine_ls_weighting_scheme       calc
_refine_ls_weighting_details
 'calc w=1/[\s^2^(Fo^2^)+(0.1000P)^2^+0.0000P] where P=(Fo^2^+2Fc^2^)/3'
_atom_sites_solution_primary      direct
_atom_sites_solution_secondary    difmap
_atom_sites_solution_hydrogens    geom
_refine_ls_hydrogen_treatment     mixed
_refine_ls_extinction_method      none
_refine_ls_extinction_coef        ?
_refine_ls_abs_structure_details
 'Flack H D (1983), Acta Cryst. A39, 876-881'
_refine_ls_abs_structure_Flack    0.00
_refine_ls_number_reflns          8185
_refine_ls_number_parameters      485
_refine_ls_number_restraints      1
_refine_ls_R_factor_all           0.1668
_refine_ls_R_factor_gt            0.0572
_refine_ls_wR_factor_ref          0.1624
_refine_ls_wR_factor_gt           0.1290
_refine_ls_goodness_of_fit_ref    0.777
_refine_ls_restrained_S_all       0.777
_refine_ls_shift/su_max           2.872
_refine_ls_shift/su_mean          0.028
 
loop_
 _atom_site_label
 _atom_site_type_symbol
 _atom_site_fract_x
 _atom_site_fract_y
 _atom_site_fract_z
 _atom_site_U_iso_or_equiv
 _atom_site_adp_type
 _atom_site_occupancy
 _atom_site_symmetry_multiplicity
 _atom_site_calc_flag
 _atom_site_refinement_flags
 _atom_site_disorder_assembly
 _atom_site_disorder_group
Cu1 Cu 0.53838(10) 0.15783(3) -0.037393(15) 0.0472(3) Uani 1 1 d . . .
Cu2 Cu 0.52853(10) 0.11920(3) 0.094383(17) 0.0500(3) Uani 1 1 d . . .
Cl1 Cl 0.5350(2) 0.18859(6) 0.03325(4) 0.0500(5) Uani 1 1 d . . .
O11 O 0.4536(13) 0.1713(5) 0.0502(3) 0.261(10) Uani 1 1 d . . .
O12 O 0.4766(11) 0.1900(5) 0.0114(2) 0.185(5) Uani 1 1 d . . .
O13 O 0.6554(7) 0.1635(3) 0.03191(19) 0.115(3) Uani 1 1 d . . .
O14 O 0.5507(14) 0.2300(3) 0.0409(3) 0.211(6) Uani 1 1 d . . .
Cl2 Cl 0.5539(3) 0.11485(8) -0.08207(4) 0.0695(6) Uani 1 1 d . . .
O21 O 0.0464(13) 0.0761(3) 0.00373(17) 0.153(4) Uani 1 1 d . . .
O22 O -0.0768(9) 0.1274(3) 0.0268(2) 0.140(4) Uani 1 1 d . . .
O23 O 0.1572(12) 0.1271(5) 0.0249(4) 0.229(9) Uani 1 1 d . . .
O24 O 0.0470(16) 0.0728(5) 0.0435(2) 0.219(6) Uani 1 1 d . . .
Cl3 Cl 0.7828(3) 0.31250(7) 0.11693(4) 0.0678(6) Uani 1 1 d . . .
Cl4 Cl 0.0456(3) 0.10503(9) 0.02418(5) 0.0743(6) Uani 1 1 d . . .
N1 N 0.3784(6) 0.1182(2) -0.02658(16) 0.0475(19) Uani 1 1 d . . .
H1 H 0.3560 0.1272 -0.0108 0.04(2) Uiso 1 1 calc R . .
N2 N 0.3923(7) 0.1992(2) -0.04997(15) 0.051(2) Uani 1 1 d . . .
H2 H 0.3957 0.1977 -0.0671 0.09(4) Uiso 1 1 calc R . .
N3 N 0.6826(7) 0.2040(3) -0.04555(17) 0.059(2) Uani 1 1 d . . .
H3 H 0.6922 0.2035 -0.0626 0.05(2) Uiso 1 1 calc R . .
N4 N 0.6964(7) 0.1225(2) -0.02320(13) 0.0457(19) Uani 1 1 d . . .
H4 H 0.7056 0.1307 -0.0068 0.07(3) Uiso 1 1 calc R . .
N5 N 0.3737(7) 0.0884(3) 0.07627(17) 0.055(2) Uani 1 1 d . . .
H5 H 0.3581 0.1050 0.0623 0.05(3) Uiso 1 1 calc R . .
N6 N 0.3794(7) 0.1539(3) 0.11130(15) 0.057(2) Uani 1 1 d . . .
H6 H 0.3762 0.1433 0.1273 0.06(3) Uiso 1 1 calc R . .
N7 N 0.6732(7) 0.1571(3) 0.11173(17) 0.060(2) Uani 1 1 d . . .
H7 H 0.6836 0.1455 0.1274 0.06(3) Uiso 1 1 calc R . .
N8 N 0.6913(7) 0.0916(3) 0.07580(15) 0.055(2) Uani 1 1 d . . .
H8 H 0.7041 0.1083 0.0617 0.04(2) Uiso 1 1 calc R . .
C1 C 0.3962(8) 0.0695(3) -0.02491(16) 0.044(2) Uani 1 1 d . . .
H1A H 0.3085 0.0554 -0.0244 0.33(10) Uiso 1 1 calc R . .
H1B H 0.4428 0.0591 -0.0398 0.024(18) Uiso 1 1 calc R . .
C2 C 0.2660(10) 0.1324(3) -0.04293(19) 0.061(2) Uani 1 1 d . . .
H2A H 0.1820 0.1202 -0.0368 0.07(3) Uiso 1 1 calc R . .
H2B H 0.2802 0.1218 -0.0599 0.10(3) Uiso 1 1 calc R . .
C3 C 0.2597(10) 0.1811(4) -0.04281(19) 0.071(3) Uani 1 1 d . . .
H3A H 0.1917 0.1911 -0.0546 0.17(6) Uiso 1 1 calc R . .
H3B H 0.2352 0.1915 -0.0262 0.04(2) Uiso 1 1 calc R . .
C4 C 0.4013(12) 0.2468(3) -0.0437(2) 0.077(3) Uani 1 1 d . . .
H4A H 0.3953 0.2502 -0.0256 2.0(14) Uiso 1 1 calc R . .
H4B H 0.3256 0.2621 -0.0511 0.18(6) Uiso 1 1 calc R . .
C5 C 0.5306(14) 0.2677(3) -0.0528(2) 0.082(3) Uani 1 1 d . . .
H5A H 0.5415 0.2613 -0.0706 0.06(2) Uiso 1 1 calc R . .
H5B H 0.5240 0.2995 -0.0510 0.026(14) Uiso 1 1 calc R . .
C6 C 0.6527(12) 0.2516(4) -0.0389(3) 0.088(4) Uani 1 1 d . . .
H6A H 0.7294 0.2699 -0.0432 0.09(3) Uiso 1 1 calc R . .
H6B H 0.6374 0.2541 -0.0209 0.12(5) Uiso 1 1 calc R . .
C7 C 0.8125(10) 0.1889(3) -0.03525(18) 0.063(3) Uani 1 1 d . . .
H7A H 0.8861 0.2014 -0.0449 0.04(2) Uiso 1 1 calc R . .
H7B H 0.8217 0.1984 -0.0179 0.07(3) Uiso 1 1 calc R . .
C8 C 0.8155(8) 0.1397(3) -0.03673(17) 0.054(3) Uani 1 1 d . . .
H8A H 0.8973 0.1285 -0.0291 0.08(3) Uiso 1 1 calc R . .
H8B H 0.8134 0.1303 -0.0542 0.03(2) Uiso 1 1 calc R . .
C9 C 0.6959(8) 0.0725(3) -0.02366(16) 0.045(2) Uani 1 1 d . . .
H9A H 0.6569 0.0619 -0.0393 0.06(3) Uiso 1 1 calc R . .
H9B H 0.7871 0.0613 -0.0224 0.000(11) Uiso 1 1 calc R . .
C10 C 0.6132(8) 0.0570(3) -0.00159(16) 0.042(2) Uani 1 1 d . . .
C11 C 0.6766(8) 0.0492(2) 0.02121(16) 0.039(2) Uani 1 1 d . . .
H11 H 0.7701 0.0477 0.0214 0.002(13) Uiso 1 1 calc R . .
C12 C 0.6090(9) 0.0435(3) 0.04352(17) 0.047(2) Uani 1 1 d . . .
C13 C 0.4673(8) 0.0427(3) 0.04277(16) 0.039(2) Uani 1 1 d . . .
C14 C 0.4046(8) 0.0484(3) 0.02004(16) 0.045(2) Uani 1 1 d . . .
H14 H 0.3113 0.0466 0.0196 0.05(2) Uiso 1 1 calc R . .
C15 C 0.4727(8) 0.0570(3) -0.00253(15) 0.0369(19) Uani 1 1 d . . .
C16 C 0.3866(8) 0.0415(3) 0.06670(17) 0.051(2) Uani 1 1 d . . .
H16A H 0.4315 0.0232 0.0791 0.05(2) Uiso 1 1 calc R . .
H16B H 0.2982 0.0291 0.0635 0.045(19) Uiso 1 1 calc R . .
C17 C 0.2535(10) 0.0949(4) 0.0924(2) 0.076(3) Uani 1 1 d . . .
H17A H 0.1726 0.0872 0.0832 0.21(8) Uiso 1 1 calc R . .
H17B H 0.2592 0.0761 0.1072 0.04(2) Uiso 1 1 calc R . .
C18 C 0.2482(9) 0.1416(4) 0.10007(19) 0.064(3) Uani 1 1 d . . .
H18A H 0.1768 0.1459 0.1123 0.08(3) Uiso 1 1 calc R . .
H18B H 0.2298 0.1600 0.0856 0.05(2) Uiso 1 1 calc R . .
C19 C 0.3953(11) 0.2025(4) 0.1142(2) 0.079(3) Uani 1 1 d . . .
H19A H 0.3177 0.2141 0.1231 0.05(2) Uiso 1 1 calc R . .
H19B H 0.3977 0.2160 0.0977 0.06(3) Uiso 1 1 calc R . .
C20 C 0.5214(14) 0.2151(3) 0.1284(2) 0.090(3) Uani 1 1 d . . .
H20A H 0.5183 0.2466 0.1319 0.05(2) Uiso 1 1 calc R . .
H20B H 0.5211 0.1999 0.1445 0.12(4) Uiso 1 1 calc R . .
C21 C 0.6487(14) 0.2052(4) 0.1155(3) 0.098(4) Uani 1 1 d . . .
H21A H 0.7224 0.2175 0.1252 0.5(2) Uiso 1 1 calc R . .
H21B H 0.6484 0.2197 0.0992 0.18(7) Uiso 1 1 calc R . .
C22 C 0.7973(12) 0.1496(4) 0.09907(16) 0.069(3) Uani 1 1 d . . .
H22A H 0.8717 0.1583 0.1098 0.05(2) Uiso 1 1 calc R . .
H22B H 0.8009 0.1672 0.0838 0.08(3) Uiso 1 1 calc R . .
C23 C 0.8085(8) 0.1007(3) 0.09258(15) 0.056(3) Uani 1 1 d . . .
H23A H 0.8925 0.0946 0.0840 0.000(14) Uiso 1 1 calc R . .
H23B H 0.8040 0.0827 0.1077 1.7(13) Uiso 1 1 calc R . .
C24 C 0.6889(9) 0.0453(3) 0.06739(17) 0.053(2) Uani 1 1 d . . .
H24A H 0.6476 0.0268 0.0801 0.05(2) Uiso 1 1 calc R . .
H24B H 0.7798 0.0348 0.0645 0.042(18) Uiso 1 1 calc R . .
O100 O 0.5224(10) 0.3380(2) 0.08935(13) 0.112(2) Uiso 1 1 d . . .
O200 O 0.2516(7) 0.3134(2) 0.10333(14) 0.097(2) Uiso 1 1 d . . .
O300 O 0.0449(10) 0.2553(3) 0.11728(15) 0.125(2) Uiso 1 1 d . . .
O400 O 0.2972(14) 0.4449(3) 0.09736(18) 0.164(4) Uiso 1 1 d . . .
O500 O 0.5509(19) 0.4766(4) 0.0378(2) 0.216(5) Uiso 1 1 d . . .
O600 O 0.5317(18) 0.4257(4) 0.0789(2) 0.208(4) Uiso 1 1 d . . .
 
loop_
 _atom_site_aniso_label
 _atom_site_aniso_U_11
 _atom_site_aniso_U_22
 _atom_site_aniso_U_33
 _atom_site_aniso_U_23
 _atom_site_aniso_U_13
 _atom_site_aniso_U_12
Cu1 0.0499(5) 0.0416(5) 0.0500(5) 0.0033(4) -0.0022(5) -0.0009(5)
Cu2 0.0528(5) 0.0499(6) 0.0473(6) -0.0041(4) -0.0040(5) -0.0039(6)
Cl1 0.0572(11) 0.0429(11) 0.0499(12) -0.0001(9) 0.0002(13) -0.0002(12)
O11 0.177(11) 0.240(16) 0.36(2) 0.179(16) 0.151(13) 0.081(11)
O12 0.186(11) 0.261(14) 0.107(8) -0.043(8) -0.058(7) 0.097(10)
O13 0.073(5) 0.110(7) 0.163(9) -0.007(6) 0.018(5) 0.044(5)
O14 0.125(8) 0.097(7) 0.412(19) -0.098(9) -0.021(12) 0.014(8)
Cl2 0.0768(17) 0.0855(16) 0.0461(12) -0.0047(11) -0.0046(12) 0.0001(14)
O21 0.145(7) 0.188(9) 0.126(7) -0.043(7) 0.003(8) 0.063(9)
O22 0.078(6) 0.094(7) 0.247(14) -0.050(8) -0.001(6) 0.014(5)
O23 0.096(9) 0.134(11) 0.46(3) -0.059(14) 0.034(10) -0.027(8)
O24 0.170(10) 0.356(18) 0.130(9) 0.074(10) -0.005(10) 0.046(15)
Cl3 0.0669(12) 0.0642(14) 0.0723(14) -0.0106(11) 0.0002(14) -0.0085(14)
Cl4 0.0498(13) 0.0961(17) 0.0768(17) -0.0126(15) -0.0028(14) 0.0041(17)
N1 0.039(4) 0.049(5) 0.055(5) -0.005(4) -0.001(3) -0.003(3)
N2 0.069(5) 0.037(5) 0.047(5) 0.014(4) 0.003(4) 0.010(4)
N3 0.073(5) 0.042(5) 0.062(6) -0.003(4) 0.000(4) -0.016(4)
N4 0.062(4) 0.046(5) 0.029(4) -0.004(3) 0.005(3) -0.005(4)
N5 0.052(4) 0.055(5) 0.057(6) -0.014(5) 0.007(4) 0.004(4)
N6 0.064(5) 0.076(7) 0.032(5) 0.002(4) -0.008(3) 0.014(4)
N7 0.069(5) 0.049(6) 0.061(6) 0.003(4) -0.001(4) -0.022(4)
N8 0.063(5) 0.060(6) 0.041(5) 0.009(4) 0.001(3) -0.009(4)
C1 0.058(5) 0.031(5) 0.045(6) -0.004(4) 0.002(4) -0.001(4)
C2 0.050(6) 0.065(6) 0.068(7) 0.011(5) -0.007(5) -0.003(5)
C3 0.062(7) 0.094(9) 0.056(6) 0.016(5) 0.000(5) 0.014(6)
C4 0.089(7) 0.038(6) 0.102(9) -0.003(6) 0.005(6) 0.017(6)
C5 0.121(8) 0.037(5) 0.089(8) 0.004(5) 0.006(8) 0.016(8)
C6 0.105(10) 0.042(7) 0.118(12) -0.014(7) 0.009(7) -0.010(6)
C7 0.063(7) 0.064(7) 0.062(7) 0.003(5) 0.000(5) -0.025(5)
C8 0.035(6) 0.071(7) 0.055(6) 0.006(5) 0.003(4) -0.011(5)
C9 0.048(5) 0.050(6) 0.037(5) 0.010(4) 0.004(4) 0.006(4)
C10 0.054(6) 0.032(5) 0.039(5) 0.000(4) 0.011(4) 0.007(4)
C11 0.040(5) 0.029(5) 0.049(6) 0.005(4) 0.007(4) 0.002(4)
C12 0.064(6) 0.027(5) 0.049(6) -0.012(4) -0.002(5) 0.004(4)
C13 0.051(6) 0.030(5) 0.035(5) -0.002(4) 0.005(4) 0.006(4)
C14 0.048(6) 0.038(5) 0.048(6) 0.000(4) 0.002(4) -0.010(4)
C15 0.048(6) 0.031(5) 0.031(5) -0.007(4) 0.002(4) -0.002(4)
C16 0.046(5) 0.060(6) 0.048(6) -0.001(5) 0.014(4) 0.004(5)
C17 0.067(8) 0.078(8) 0.082(8) -0.023(7) 0.011(6) -0.011(6)
C18 0.056(7) 0.087(8) 0.050(6) -0.004(6) 0.001(5) 0.019(5)
C19 0.098(9) 0.061(8) 0.077(9) -0.007(7) 0.009(7) 0.011(6)
C20 0.122(10) 0.061(7) 0.086(8) -0.019(6) -0.001(9) 0.005(7)
C21 0.130(11) 0.057(8) 0.107(11) 0.022(8) -0.004(9) -0.027(7)
C22 0.071(7) 0.099(8) 0.036(5) 0.000(5) -0.010(6) -0.036(7)
C23 0.022(5) 0.092(8) 0.056(5) -0.017(5) -0.004(4) -0.009(5)
C24 0.070(6) 0.047(6) 0.042(6) -0.001(5) 0.004(5) 0.011(5)
 
_geom_special_details
;
 All esds (except the esd in the dihedral angle between two l.s. planes)
 are estimated using the full covariance matrix.  The cell esds are taken
 into account individually in the estimation of esds in distances, angles
 and torsion angles; correlations between esds in cell parameters are only
 used when they are defined by crystal symmetry.  An approximate (isotropic)
 treatment of cell esds is used for estimating esds involving l.s. planes.
;
 
loop_
 _geom_bond_atom_site_label_1
 _geom_bond_atom_site_label_2
 _geom_bond_distance
 _geom_bond_site_symmetry_2
 _geom_bond_publ_flag
Cu1 N2 2.029(7) . ?
Cu1 N4 2.044(7) . ?
Cu1 N3 2.048(7) . ?
Cu1 N1 2.073(7) . ?
Cu1 Cl2 2.711(2) . ?
Cu1 Cu2 7.1004(12) . ?
Cu2 N6 2.027(8) . ?
Cu2 N5 2.041(7) . ?
Cu2 N7 2.058(8) . ?
Cu2 N8 2.070(8) . ?
Cu2 Cl3 2.678(2) 16_445 ?
Cl1 O12 1.301(9) . ?
Cl1 O11 1.321(11) . ?
Cl1 O14 1.327(8) . ?
Cl1 O13 1.418(7) . ?
Cl2 O200 11.924(8) . ?
Cl2 O400 14.039(11) . ?
O21 Cl4 1.395(9) . ?
O21 O500 13.234(19) . ?
O22 Cl4 1.399(9) . ?
O23 Cl4 1.295(12) . ?
O24 Cl4 1.417(12) . ?
O24 O500 13.20(2) . ?
Cl3 Cu2 2.678(2) 4 ?
Cl3 O300 7.534(10) . ?
N1 C2 1.479(11) . ?
N1 C1 1.486(10) . ?
N1 H1 0.9100 . ?
N2 C3 1.477(12) . ?
N2 C4 1.481(13) . ?
N2 H2 0.9100 . ?
N3 C7 1.475(12) . ?
N3 C6 1.511(13) . ?
N3 H3 0.9100 . ?
N4 C8 1.480(10) . ?
N4 C9 1.512(11) . ?
N4 H4 0.9100 . ?
N5 C17 1.486(11) . ?
N5 C16 1.512(11) . ?
N5 H5 0.9100 . ?
N6 C19 1.485(13) . ?
N6 C18 1.481(12) . ?
N6 H6 0.9100 . ?
N7 C22 1.423(14) . ?
N7 C21 1.488(14) . ?
N7 H7 0.9100 . ?
N8 C24 1.470(11) . ?
N8 C23 1.493(11) . ?
N8 H8 0.9100 . ?
C1 C15 1.462(12) . ?
C1 H1A 0.9700 . ?
C1 H1B 0.9700 . ?
C2 C3 1.473(15) . ?
C2 H2A 0.9700 . ?
C2 H2B 0.9700 . ?
C3 H3A 0.9700 . ?
C3 H3B 0.9700 . ?
C4 C5 1.513(16) . ?
C4 H4A 0.9700 . ?
C4 H4B 0.9700 . ?
C5 C6 1.502(16) . ?
C5 H5A 0.9700 . ?
C5 H5B 0.9700 . ?
C6 H6A 0.9700 . ?
C6 H6B 0.9700 . ?
C7 C8 1.491(13) . ?
C7 H7A 0.9700 . ?
C7 H7B 0.9700 . ?
C8 H8A 0.9700 . ?
C8 H8B 0.9700 . ?
C9 C10 1.507(11) . ?
C9 H9A 0.9700 . ?
C9 H9B 0.9700 . ?
C10 C11 1.386(11) . ?
C10 C15 1.398(9) . ?
C11 C12 1.373(11) . ?
C11 H11 0.9300 . ?
C12 C13 1.409(9) . ?
C12 C24 1.498(12) . ?
C13 C14 1.370(11) . ?
C13 C16 1.504(11) . ?
C14 C15 1.401(11) . ?
C14 H14 0.9300 . ?
C16 H16A 0.9700 . ?
C16 H16B 0.9700 . ?
C17 C18 1.468(16) . ?
C17 H17A 0.9700 . ?
C17 H17B 0.9700 . ?
C18 H18A 0.9700 . ?
C18 H18B 0.9700 . ?
C19 C20 1.512(15) . ?
C19 H19A 0.9700 . ?
C19 H19B 0.9700 . ?
C20 C21 1.471(17) . ?
C20 H20A 0.9700 . ?
C20 H20B 0.9700 . ?
C21 H21A 0.9700 . ?
C21 H21B 0.9700 . ?
C22 C23 1.522(14) . ?
C22 H22A 0.9700 . ?
C22 H22B 0.9700 . ?
C23 H23A 0.9700 . ?
C23 H23B 0.9700 . ?
C24 H24A 0.9700 . ?
C24 H24B 0.9700 . ?
O100 O600 2.711(15) . ?
O100 O200 2.889(12) . ?
O200 O300 2.803(11) . ?
O300 O400 6.348(13) . ?
O400 O600 2.59(2) . ?
O500 O600 2.679(17) . ?
 
loop_
 _geom_angle_atom_site_label_1
 _geom_angle_atom_site_label_2
 _geom_angle_atom_site_label_3
 _geom_angle
 _geom_angle_site_symmetry_1
 _geom_angle_site_symmetry_3
 _geom_angle_publ_flag
N2 Cu1 N4 173.5(3) . . ?
N2 Cu1 N3 90.6(2) . . ?
N4 Cu1 N3 84.1(3) . . ?
N2 Cu1 N1 84.2(3) . . ?
N4 Cu1 N1 100.6(2) . . ?
N3 Cu1 N1 172.0(3) . . ?
N2 Cu1 Cl2 92.7(2) . . ?
N4 Cu1 Cl2 91.6(2) . . ?
N3 Cu1 Cl2 95.9(3) . . ?
N1 Cu1 Cl2 90.5(2) . . ?
N2 Cu1 Cu2 114.6(2) . . ?
N4 Cu1 Cu2 63.94(19) . . ?
N3 Cu1 Cu2 109.3(2) . . ?
N1 Cu1 Cu2 67.7(2) . . ?
Cl2 Cu1 Cu2 141.78(5) . . ?
N6 Cu2 N5 84.0(3) . . ?
N6 Cu2 N7 91.4(3) . . ?
N5 Cu2 N7 173.3(3) . . ?
N6 Cu2 N8 172.5(3) . . ?
N5 Cu2 N8 100.4(2) . . ?
N7 Cu2 N8 83.8(3) . . ?
N6 Cu2 Cl3 90.2(2) . 16_445 ?
N5 Cu2 Cl3 94.7(3) . 16_445 ?
N7 Cu2 Cl3 90.1(3) . 16_445 ?
N8 Cu2 Cl3 95.5(2) . 16_445 ?
N6 Cu2 Cu1 111.2(2) . . ?
N5 Cu2 Cu1 67.7(2) . . ?
N7 Cu2 Cu1 109.9(3) . . ?
N8 Cu2 Cu1 65.5(2) . . ?
Cl3 Cu2 Cu1 149.59(5) 16_445 . ?
O12 Cl1 O11 110.6(11) . . ?
O12 Cl1 O14 107.1(9) . . ?
O11 Cl1 O14 103.8(11) . . ?
O12 Cl1 O13 110.5(6) . . ?
O11 Cl1 O13 109.8(6) . . ?
O14 Cl1 O13 115.0(7) . . ?
Cu1 Cl2 O200 11.63(6) . . ?
Cu1 Cl2 O400 18.90(6) . . ?
O200 Cl2 O400 15.16(5) . . ?
Cl4 O21 O500 47.3(5) . . ?
Cl4 O24 O500 49.5(6) . . ?
Cu2 Cl3 O300 97.45(9) 4 . ?
O23 Cl4 O21 110.0(9) . . ?
O23 Cl4 O22 119.5(6) . . ?
O21 Cl4 O22 112.7(7) . . ?
O23 Cl4 O24 108.8(11) . . ?
O21 Cl4 O24 97.7(7) . . ?
O22 Cl4 O24 105.7(8) . . ?
C2 N1 C1 114.4(7) . . ?
C2 N1 Cu1 104.4(5) . . ?
C1 N1 Cu1 119.9(5) . . ?
C2 N1 H1 105.7 . . ?
C1 N1 H1 105.7 . . ?
Cu1 N1 H1 105.7 . . ?
C3 N2 C4 110.8(8) . . ?
C3 N2 Cu1 109.0(5) . . ?
C4 N2 Cu1 118.8(7) . . ?
C3 N2 H2 105.8 . . ?
C4 N2 H2 105.8 . . ?
Cu1 N2 H2 105.8 . . ?
C7 N3 C6 112.4(8) . . ?
C7 N3 Cu1 108.8(5) . . ?
C6 N3 Cu1 117.6(7) . . ?
C7 N3 H3 105.7 . . ?
C6 N3 H3 105.7 . . ?
Cu1 N3 H3 105.7 . . ?
C8 N4 C9 110.3(7) . . ?
C8 N4 Cu1 104.5(5) . . ?
C9 N4 Cu1 121.0(5) . . ?
C8 N4 H4 106.7 . . ?
C9 N4 H4 106.7 . . ?
Cu1 N4 H4 106.7 . . ?
C17 N5 C16 112.9(8) . . ?
C17 N5 Cu2 105.8(5) . . ?
C16 N5 Cu2 121.6(5) . . ?
C17 N5 H5 105.1 . . ?
C16 N5 H5 105.1 . . ?
Cu2 N5 H5 105.1 . . ?
C19 N6 C18 112.7(8) . . ?
C19 N6 Cu2 118.8(6) . . ?
C18 N6 Cu2 109.5(6) . . ?
C19 N6 H6 104.8 . . ?
C18 N6 H6 104.8 . . ?
Cu2 N6 H6 104.8 . . ?
C22 N7 C21 111.2(9) . . ?
C22 N7 Cu2 107.7(6) . . ?
C21 N7 Cu2 119.3(7) . . ?
C22 N7 H7 105.9 . . ?
C21 N7 H7 105.9 . . ?
Cu2 N7 H7 105.9 . . ?
C24 N8 C23 111.7(7) . . ?
C24 N8 Cu2 121.1(5) . . ?
C23 N8 Cu2 104.5(5) . . ?
C24 N8 H8 106.2 . . ?
C23 N8 H8 106.2 . . ?
Cu2 N8 H8 106.2 . . ?
C15 C1 N1 111.5(7) . . ?
C15 C1 H1A 109.3 . . ?
N1 C1 H1A 109.3 . . ?
C15 C1 H1B 109.3 . . ?
N1 C1 H1B 109.3 . . ?
H1A C1 H1B 108.0 . . ?
N1 C2 C3 108.7(8) . . ?
N1 C2 H2A 109.9 . . ?
C3 C2 H2A 109.9 . . ?
N1 C2 H2B 110.0 . . ?
C3 C2 H2B 109.9 . . ?
H2A C2 H2B 108.3 . . ?
N2 C3 C2 109.3(8) . . ?
N2 C3 H3A 109.8 . . ?
C2 C3 H3A 109.8 . . ?
N2 C3 H3B 109.8 . . ?
C2 C3 H3B 109.8 . . ?
H3A C3 H3B 108.3 . . ?
N2 C4 C5 112.7(8) . . ?
N2 C4 H4A 109.1 . . ?
C5 C4 H4A 109.0 . . ?
N2 C4 H4B 109.1 . . ?
C5 C4 H4B 109.1 . . ?
H4A C4 H4B 107.8 . . ?
C6 C5 C4 113.1(8) . . ?
C6 C5 H5A 109.0 . . ?
C4 C5 H5A 109.0 . . ?
C6 C5 H5B 109.0 . . ?
C4 C5 H5B 109.0 . . ?
H5A C5 H5B 107.8 . . ?
N3 C6 C5 110.6(9) . . ?
N3 C6 H6A 109.5 . . ?
C5 C6 H6A 109.6 . . ?
N3 C6 H6B 109.5 . . ?
C5 C6 H6B 109.5 . . ?
H6A C6 H6B 108.1 . . ?
C8 C7 N3 107.9(7) . . ?
C8 C7 H7A 110.1 . . ?
N3 C7 H7A 110.1 . . ?
C8 C7 H7B 110.1 . . ?
N3 C7 H7B 110.1 . . ?
H7A C7 H7B 108.4 . . ?
C7 C8 N4 108.1(7) . . ?
C7 C8 H8A 110.1 . . ?
N4 C8 H8A 110.1 . . ?
C7 C8 H8B 110.1 . . ?
N4 C8 H8B 110.1 . . ?
H8A C8 H8B 108.4 . . ?
C10 C9 N4 107.5(6) . . ?
C10 C9 H9A 110.2 . . ?
N4 C9 H9A 110.2 . . ?
C10 C9 H9B 110.2 . . ?
N4 C9 H9B 110.2 . . ?
H9A C9 H9B 108.5 . . ?
C11 C10 C15 119.1(8) . . ?
C11 C10 C9 119.1(7) . . ?
C15 C10 C9 121.1(9) . . ?
C12 C11 C10 123.6(8) . . ?
C12 C11 H11 118.2 . . ?
C10 C11 H11 118.2 . . ?
C11 C12 C13 117.8(9) . . ?
C11 C12 C24 117.9(8) . . ?
C13 C12 C24 123.7(9) . . ?
C14 C13 C12 118.5(9) . . ?
C14 C13 C16 120.4(8) . . ?
C12 C13 C16 120.7(9) . . ?
C13 C14 C15 124.0(8) . . ?
C13 C14 H14 118.0 . . ?
C15 C14 H14 118.0 . . ?
C10 C15 C14 116.9(8) . . ?
C10 C15 C1 123.3(8) . . ?
C14 C15 C1 119.6(7) . . ?
C13 C16 N5 107.9(7) . . ?
C13 C16 H16A 110.1 . . ?
N5 C16 H16A 110.1 . . ?
C13 C16 H16B 110.1 . . ?
N5 C16 H16B 110.1 . . ?
H16A C16 H16B 108.4 . . ?
C18 C17 N5 108.5(8) . . ?
C18 C17 H17A 110.0 . . ?
N5 C17 H17A 110.0 . . ?
C18 C17 H17B 110.0 . . ?
N5 C17 H17B 110.0 . . ?
H17A C17 H17B 108.4 . . ?
C17 C18 N6 108.8(8) . . ?
C17 C18 H18A 109.9 . . ?
N6 C18 H18A 109.9 . . ?
C17 C18 H18B 109.9 . . ?
N6 C18 H18B 109.9 . . ?
H18A C18 H18B 108.3 . . ?
N6 C19 C20 113.0(9) . . ?
N6 C19 H19A 109.0 . . ?
C20 C19 H19A 109.0 . . ?
N6 C19 H19B 109.0 . . ?
C20 C19 H19B 109.0 . . ?
H19A C19 H19B 107.8 . . ?
C21 C20 C19 115.3(9) . . ?
C21 C20 H20A 108.5 . . ?
C19 C20 H20A 108.4 . . ?
C21 C20 H20B 108.5 . . ?
C19 C20 H20B 108.5 . . ?
H20A C20 H20B 107.5 . . ?
C20 C21 N7 113.8(9) . . ?
C20 C21 H21A 108.8 . . ?
N7 C21 H21A 108.8 . . ?
C20 C21 H21B 108.8 . . ?
N7 C21 H21B 108.8 . . ?
H21A C21 H21B 107.7 . . ?
N7 C22 C23 109.0(8) . . ?
N7 C22 H22A 109.9 . . ?
C23 C22 H22A 109.9 . . ?
N7 C22 H22B 109.9 . . ?
C23 C22 H22B 109.9 . . ?
H22A C22 H22B 108.3 . . ?
N8 C23 C22 104.9(8) . . ?
N8 C23 H23A 110.8 . . ?
C22 C23 H23A 110.8 . . ?
N8 C23 H23B 110.8 . . ?
C22 C23 H23B 110.7 . . ?
H23A C23 H23B 108.8 . . ?
N8 C24 C12 107.5(7) . . ?
N8 C24 H24A 110.2 . . ?
C12 C24 H24A 110.2 . . ?
N8 C24 H24B 110.2 . . ?
C12 C24 H24B 110.2 . . ?
H24A C24 H24B 108.5 . . ?
O600 O100 O200 109.6(5) . . ?
O300 O200 O100 155.8(4) . . ?
O300 O200 Cl2 95.0(2) . . ?
O100 O200 Cl2 71.5(2) . . ?
O200 O300 O400 25.8(2) . . ?
O200 O300 Cl3 30.9(2) . . ?
O400 O300 Cl3 53.69(15) . . ?
O600 O400 O300 102.4(4) . . ?
O600 O400 Cl2 54.6(4) . . ?
O300 O400 Cl2 62.78(11) . . ?
O600 O500 O24 54.7(4) . . ?
O600 O500 O21 63.8(4) . . ?
O24 O500 O21 9.19(6) . . ?
O400 O600 O500 104.0(7) . . ?
O400 O600 O100 96.4(6) . . ?
O500 O600 O100 137.0(6) . . ?
 
_diffrn_measured_fraction_theta_max    0.941
_diffrn_reflns_theta_full              27.49
_diffrn_measured_fraction_theta_full   0.941
_refine_diff_density_max    0.716
_refine_diff_density_min   -0.346
_refine_diff_density_rms    0.081
